# Supplementary material for: The impact of glucose exposure on bioenergetics and function in a cultured endothelial cell model and the implications for cardiovascular health in diabetes
Source: PubMed Central journal article supplement (PMC7659000; doi:10.1038/s41598-020-76505-4), 2020-11-11
Supplement: 41598_2020_76505_MOESM1_ESM.pdf [file 41598_2020_76505_MOESM1_ESM.pdf]

**The impact of glucose exposure on bioenergetics and function in a cultured endothelial cell model  
and implications for cardiovascular health in diabetes**

Maria Luisa Fiorello, Andrew T Treweeke, David P Macfarlane, Ian L Megson

**Supplementary Fig S1**

**A**

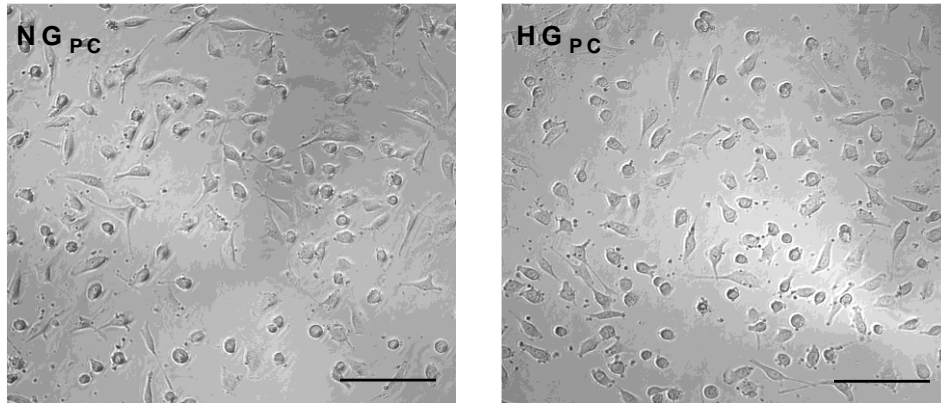

**B**

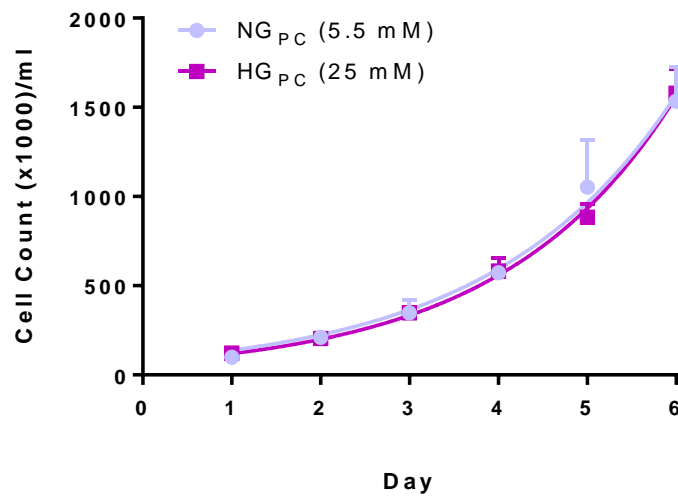

**Supplementary Fig 1.** Cell morphology (A) and growth rate (B) in cells cultured through >5 passages under normoglycaemic (5.5 mM starting concentration; NG<sub>PC</sub>) or hyperglycaemic (25 mM starting concentration; HG<sub>PC</sub>) conditions. There was no apparent change in morphology or growth rate ( $P>0.05$ ; 2-factor ANOVA) induced by NG<sub>PC</sub>. Scale bar: 150  $\mu\text{m}$ . Cells used for treatment experiments were passaged at ~90% confluence and reached full confluence by conclusion of the incubation period.

## Supplementary Fig S2

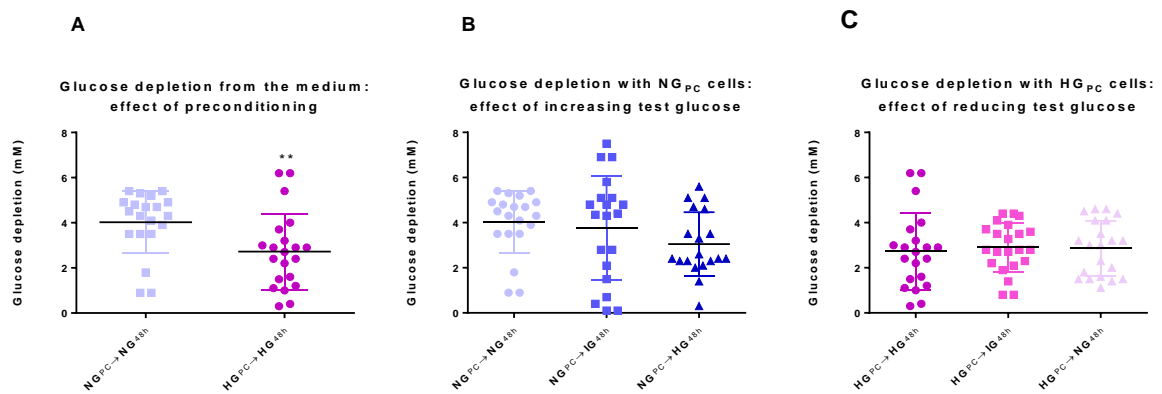

**Supplementary Fig S2.** (A) Effect of glucose preconditioning on glucose depletion from medium over 24 h ( $***P < 0.001$ ; Mann Whitney U test). (B) Effect of 48 h exposure of increasing glucose concentrations to  $NG_{PC}$  cells on glucose depletion from the medium ( $P > 0.05$ ; Kruskal Wallis). (C) Effect of 48 h exposure of decreasing glucose concentrations to  $HG_{PC}$  cells on glucose depletion from the medium ( $P > 0.05$ ; Kruskal Wallis).

## Supplementary Fig S3

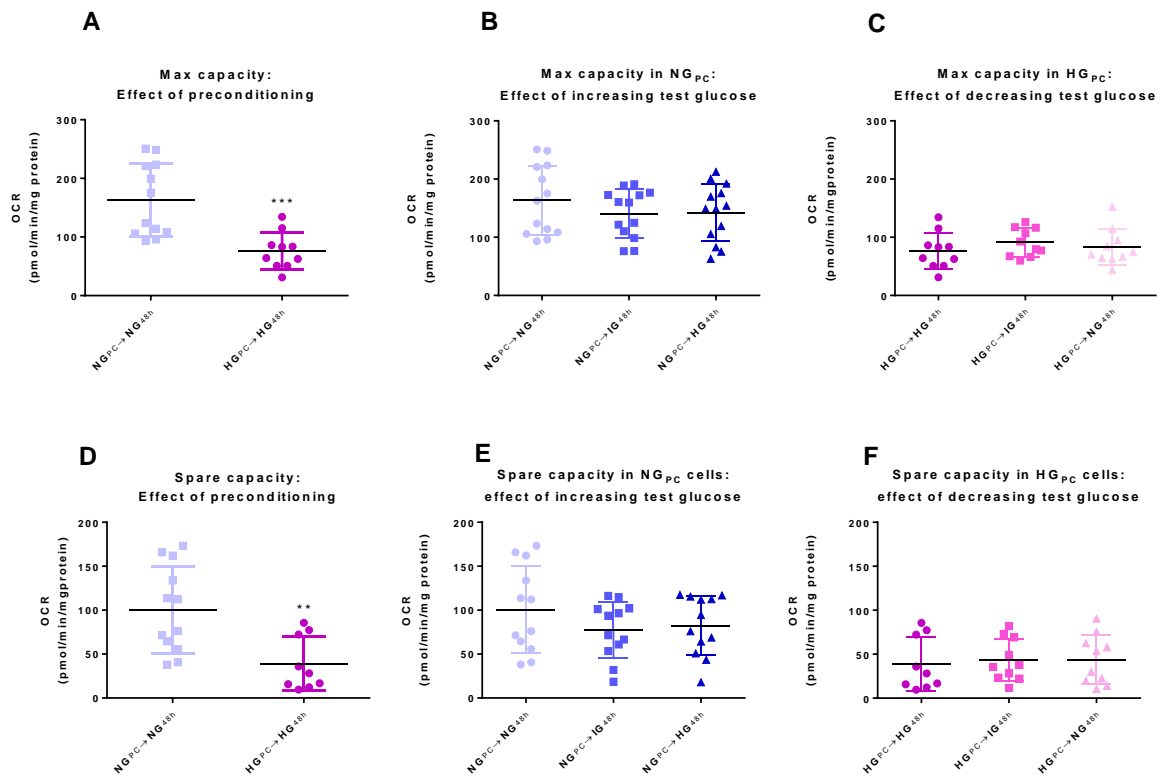

**Supplementary Fig S3.** Effect of glucose preconditioning on maximum capacity (A) and spare capacity (D) (\*\*\*)  $P < 0.001$ ; \*\*  $P < 0.01$ , Mann Whitney U test). Effect of 48 h exposure of increasing glucose concentrations to NG<sub>PC</sub> cells on maximum capacity (B) and spare capacity (E) ( $P > 0.05$ ; Kruskal-Wallis). Effect of 48 h exposure of decreasing glucose concentrations to HG<sub>PC</sub> cells on maximum capacity (C) and spare capacity (F) ( $P > 0.05$ ; Kruskal-Wallis).
